# Supplementary material for: A Theoretical Justification for Single Molecule Peptide Sequencing
Source: PubMed Central journal article supplement (PMC4341059; doi:10.1371/journal.pcbi.1004080), 2015-02-25
Supplement: pcbi.1004080.s001.pdf [file pcbi.1004080.s001.pdf]

## Text S1: Detailed pseudo-code describing the algorithm employed for the simulation

*Definitions and Input of experimental parameters:*

**proteome** is the set of all **protein** species. Each **protein** is a sequence of amino acids represented as a sequence of **tuples**  $(aa_i, s_i)$  where  $aa_i$  is the amino acid at position  $s_i$ . The **tuples** are sequenced and positions are indexed from the N- to the C- terminuses of the protein, with the first amino acid having position **1**.

Amino acid **cleave** indicating site at which protease is active. Proteolysis takes place at the carboxyl side of the

amino acid. Example: For cyanogen bromide, **cleave** = Met.

Mapping **labels** from set of amino acids to dyes used to label them

Example: **labels** = {Lys: red, Tyr: green} indicates lysines are labeled using a red dye and tyrosines are

labeled with a green dye

Amino acid **attachment** indicating which amino acid is used to functionalize peptides to the slide

Example: **attachment** = Cys indicates peptides are functionalized via cystines

Probability  $u \in [0, 1]$  of unsuccessfully labeling an amino acid. This occurs when an amino acid intended to be

labeled per **labels** fails to covalently bond to its dye, or the dye that bonds is defective before the experiment begins. **u** is constant across all **labels**.

Probability  $p \in [0, 1]$  of the Edman cycle successfully cleaving off the N-terminal amino acid from a peptide.

Photobleaching constant  $b \in [0, \infty)$  indicating the photobleaching half-life of all fluorors.

Number of experimental **cycles** the sample will be subjected to.

Function **random()** is provided by the system and yields random floating point numbers in  $[0, 1]$ .

Function **binomial**( $x, y$ ) is provided by the system and returns the binomial coefficient  $\binom{x}{y}$   
**e** is Euler's constant.

Function **sort()** sorts **tuples**  $(aa_i, s_i)$  in by  $s_i$  in ascending order

Each protein is sampled a **simulation\_depth** number of times.

*Algorithm section 1: Definition of prefix trie used to collate simulation results and associated utility functions*

*Definitions:*

A **node** in the trie stores three items:

1. **tuple**  $(aa_i, s_i)$
2. references to all **children nodes** by their **tuples**  $(aa_i, s_i)$ ; for simplicity, we omit the creation of child nodes in this pseudocode and assume they all exist
3. **counters** for all proteins, *i.e.* a mapping from the **proteome** to the set of integers, notated by **counter[protein]**; all **counters** are initialized to 0

The **root node** stores only references to all **children nodes**

Each sequence of **tuples**  $(aa_i, s_i)$  uniquely maps to a node in the trie by walking the trie starting from the root

node, with each successive **tuple**  $(aa_i, s_i)$  indicating the child node to visit next. The sequence is mapped

to the last node the walk arrives at. See function **increment\_counter** below for an illustration.

*Functions:*

```
FUNCTION increment_counter(sequence of tuples (aai, si), protein):  
    current_node ← root node  
    FOR tuple (aai, si) IN sequence of tuples:  
        current_node ← child (aai, si) of current node  
        #current_node is now the node that the sequence of tuples maps uniquely onto  
        counter[protein] ← counter[protein] + 1  
FUNCTION recursive_traverse(node):  
    list_of_nodes ← (node) #list of all child nodes including self  
    FOR node IN children nodes:  
        list_of_nodes ← list_of_nodes + recursive_traverse(node)  
    RETURN list_of_nodes
```

*Algorithm section 2: Experiment initialization*

```
peptides[protein] = NULL  
    #this will store all peptides proteolysed from protein that are hybridized to the  
    #surface  
  
FOR protein IN proteome:  
    peptides ← proteolyze protein using cleave  
    #peptides is the set of all subsequences of the protein  
    #partitioned after tuples with aai=cleave; for example,  
    #((K, 1) (M, 2)(C, 3)(M,4)) would yield the set  
    #{ ((K, 1), (M,2)), ((C, 3), (M, 4)) }  
    FOR peptide IN peptides:  
        IF attachment NOT IN peptide:  
            discard peptide #peptides not having attachment cannot attach to the surface and are  
            #washed away  
    FOR peptide IN peptides:  
        FOR tuple (aai, si) IN peptide:  
            IF aai NOT IN labels:  
                discard tuple from peptide #ignore unlabeled amino acids  
    peptides[protein] ← peptides
```

*Algorithm section 3: Monte Carlo simulation*

```
FUNCTION simulate(peptide, protein):  
    #the sequence of tuples in peptide is copied for every call of this function and is manipulated below  
    sequence ← copy(peptide)  
  
    ###simulate fluor label failure  
    FOR tuple (aai, si) IN sequence:  
        IF random() < u:  
            discard (aai, si) from the sequence  
    ###end of fluor label failure section  
  
    ###simulate Edman failure
```

```

cumulative_delay = 0 #temporary variable keeping track of total Edman failures
FOR tuple (aai, si) IN sequence:
  d ← si IF this is the first tuple in the sequence ELSE si - si-1
    #distance between consecutive labels
  delay_sample = random() #generate random point for delay probability distribution
  delay = 0 #keep track of delays for interval between (aai, si) and (aai-1, si-1)
  accumulator = 0 #temporary variable for accumulating delay probabilities
  #map delay onto [0, 1] via its probability distribution
  WHILE:
    binomial_pdf = 0 #binomial probability density function
    IF random_delay = 0:
      binomial_pdf ← pd
    ELSE:
      binomial_pdf ← binomial(d - 1, d - 1 + delay) * pd * (1 - p)delay -
        binomial(d - 1, d - 2 + delay) * pd * (1 - p)delay - 1
      accumulator ← accumulator + binomial_pdf
      #test if this was the delay chosen by delay_sample
      IF accumulator ≥ delay_sample:
        BREAK
      ELSE:
        delay ← delay + 1
    cumulative_delay ← cumulative_delay + delay
    (aai, si) ← (aai, si + cumulative_delay)
    #delay aai in fluorosequence due to all prior Edman failures
    #simulation assumes Edman cannot proceed past the first amino acid hybridized to the surface
    IF aai = attachment:
      #although Edman cannot reach them, the delay still affects fluors after attachment due to
      #photobleaching
      FOR (aaj, sj) IN sequence:
        IF j > i:
          (aaj, sj) ← (aaj, sj + cumulative_delay)
        BREAK
    ###end of Edman failure section

    ###simulate photobleaching
    #first loop photobleaches fluors before the first attachment, because
    # Edman cannot proceed past it
    #second loop (further below) photobleaches fluors after first attachment
    FOR (aai, si) IN sequence:
      #this IF statement stops the first loop at the first attachment
      IF aai = attachment:
        BREAK
      photobleach_sample = random()
      #random point for photobleaching probability distribution
      accumulator = 0 #temporary variable for accumulating photobleaching probabilities
      exposures = cycles + 1 IF cycles < si ELSE si #number of exposures for the fluor
      FOR k FROM 0 TO exposures - 1:
        accumulator ← accumulator + e-bk
        IF accumulator * (1 - e-b) ≥ photobleach_sample:
          (aai, si) ← (aai, k + 1)
          BREAK

```

```

#second loop photobleaches fluors after first attachment
FOR (aai, si) IN sequence:
  #this IF statement ignores all fluors before the first attachment
  IF aai = attachment:
    CONTINUE
  photobleach_sample = random()
  #random point for photobleaching probability distribution
  accumulator = 0 #temporary variable for accumulating photobleaching probabilities
  exposures = cycles #number of exposures for these fluor is always all cycles
  FOR k FROM 0 TO exposures - 1:
    accumulator ← accumulator + e-bk
    IF accumulator * (1 - e-b) ≥ photobleach_sample:
      (aai, si) ← (aai, k + 1)
      BREAK
###end of photobleaching section

#sort sequence by final observations and collate result into trie
sequence ← sort(sequence)
increment_counter(sequence, protein)

#main simulation loop
FOR protein IN proteome:
  FOR k FROM 0 to simulation_depth:
    FOR peptide IN peptides[protein]:
      simulate(peptide, protein)

```

Algorithm section 4: Count identified proteins

```

identified_proteins = {} #set of all proteins considered classified

FOR node in recursive_traverse(root node):
  total_source_proteins = 0 #calculate total number of times the fluorosequence mapping to this
  node
  #has been observed
  FOR protein IN counters:
    total_source_proteins ← total_source_proteins + counters[protein]
  FOR protein IN counters:
    IF counters[protein] > 10 AND counters[protein] / total_source_proteins > 0.90:
      identified_proteins ← identified_proteins + protein

RETURN identified_proteins

```
